# Supplementary material for: mRNA-mediated delivery of gene editing tools to human primary muscle stem cells
Source: PubMed Central journal article supplement — Mol Ther Nucleic Acids. 2022 Feb 28;28:47–57. doi: 10.1016/j.omtn.2022.02.016 (PMC8931293; doi:10.1016/j.omtn.2022.02.016), 2022-02-28
Supplement: mmc1.pdf [file mmc1.pdf]

**OMTN, Volume 28**

**Supplemental information**

**mRNA-mediated delivery of gene editing tools  
to human primary muscle stem cells**

**Christian Stadelmann, Silvia Di Francescantonio, Andreas Marg, Stefanie Müthel, Simone Spuler, and Helena Escobar**

## SUPPLEMENTAL TABLES

Table S1. MuSC populations/lines used for each experiment

| Donor ID | MuSC line | Figure  |         |     |         |     |         |     |    |    |       |    |
|----------|-----------|---------|---------|-----|---------|-----|---------|-----|----|----|-------|----|
|          |           | 1       | 2       | 3   | 4       | 5   | S2      | S3  | S4 | S5 | S6    | S7 |
| A        | A1        | A,B,C,E |         |     |         |     |         |     |    |    |       |    |
|          | A2        | B,C,D,E | E,F,G   |     | B       |     | C,D,E,F |     |    |    | B     |    |
|          | A3        | E       |         |     |         |     |         | B,C |    |    |       |    |
|          | A4        |         |         | D   | F       |     |         |     |    |    |       |    |
|          | A5        |         |         |     |         |     |         |     | C  |    |       |    |
| B        | B         | B,C,E   |         |     |         |     |         |     |    |    |       |    |
| C        | C         | B,C,E   | E,F,G   | C,D | B,D,F   |     | C,D,E,F |     |    |    | B     |    |
| D        | D         | B,C     | E,F,G   |     | B       |     | C,D,E,F |     |    |    | B     |    |
| E        | E1        |         |         |     |         |     |         | C   |    |    |       |    |
|          | E2        | E       |         | D   |         |     |         |     |    |    |       |    |
| F        | F         |         |         |     |         | B,C |         |     |    |    |       |    |
| G        | G         |         | E,F     |     | A,B,C,E |     | C,F     |     |    |    | A,B,C |    |
| H        | H         |         | C,D,E,F |     | B,E     |     | C,F     |     |    |    | B     |    |
| I        | I         |         | E,F     |     | B,E     |     | B,C,F   |     |    |    | B     |    |
| J        | J         |         |         |     |         |     |         |     | A  |    |       |    |
| K        | K         | E       |         |     |         |     |         |     |    |    |       |    |
| L        | L         | E       |         |     |         |     |         |     |    |    |       |    |
| M        | M         | E       |         |     |         |     |         |     |    |    |       |    |

**Table S2. Synthetic sgRNA sequences**

| <b>Name</b>                     | <b>Sequence 5' &gt; 3' (<u>spacer</u>)</b>                                                                                   | <b>Target</b>                      |
|---------------------------------|------------------------------------------------------------------------------------------------------------------------------|------------------------------------|
| Sp_sgRNA_NCAM1<br>ex3wt#1_human | <u>AACGCCAACAUCGACGACGCGUU</u><br>UUAGAGCUAGAAAUAGCAAGUUAA<br>AAUAAGGCUAGUCCGUUAUCAAC<br>UUGAAAAAGUGGCACCGAGUCGG<br>UGCUIUUU | NCAM1 exon 3 (SpCas9)              |
| Sp_sgRNA_NCAM1<br>ex7ABE_3      | <u>CCCUACCAAAGACUUUGAGGGUU</u><br>UUAGAGCUAGAAAUAGCAAGUUAA<br>AAUAAGGCUAGUCCGUUAUCAAC<br>UUGAAAAAGUGGCACCGAGUCGG<br>UGCUIUUU | NCAM1 exon 7 splice<br>donor (ABE) |
| Sp_sgRNA_SGCAe<br>x2mut#1       | <u>AUGUCAGUGAGCGGCCUGACGUU</u><br>UUAGAGCUAGAAAUAGCAAGUUAA<br>AAUAAGGCUAGUCCGUUAUCAAC<br>UUGAAAAAGUGGCACCGAGUCGG<br>UGCUIUUU | SGCA c.157G>A (ABE)                |

**Table S3. Synthetic oligonucleotides used for PCR, sequencing and cloning**

| Oligo name | Sequence 5' > 3'                                                                                                                                                                                                                                                                                                                                                                                                                                                                                                                                                                                                                                                                                                                                                                                                                                | Purpose                                                 |
|------------|-------------------------------------------------------------------------------------------------------------------------------------------------------------------------------------------------------------------------------------------------------------------------------------------------------------------------------------------------------------------------------------------------------------------------------------------------------------------------------------------------------------------------------------------------------------------------------------------------------------------------------------------------------------------------------------------------------------------------------------------------------------------------------------------------------------------------------------------------|---------------------------------------------------------|
| HE_255     | TCTTTGTGCACACCTTGGAC                                                                                                                                                                                                                                                                                                                                                                                                                                                                                                                                                                                                                                                                                                                                                                                                                            | SGCA c.157G>A ABE, amplicon & Sanger-sequencing         |
| HE_256     | GAGGACTCAGATACCAAATTAGAGG                                                                                                                                                                                                                                                                                                                                                                                                                                                                                                                                                                                                                                                                                                                                                                                                                       |                                                         |
| CS_149     | CTGAGGAGTCTTTCCCATTG                                                                                                                                                                                                                                                                                                                                                                                                                                                                                                                                                                                                                                                                                                                                                                                                                            | NCAM1 exon 7 splice donor site ABE, amplicon sequencing |
| CS_152     | ACTAGGGCTTGGACTAGGTG                                                                                                                                                                                                                                                                                                                                                                                                                                                                                                                                                                                                                                                                                                                                                                                                                            |                                                         |
| CS_94      | TGT GGA CGT TCA ACT TGG TG                                                                                                                                                                                                                                                                                                                                                                                                                                                                                                                                                                                                                                                                                                                                                                                                                      | NCAM1 exon 7 splice donor site ABE, Sanger-sequencing   |
| CS_95      | AGG AGC TAG TTC ATC TCT GG                                                                                                                                                                                                                                                                                                                                                                                                                                                                                                                                                                                                                                                                                                                                                                                                                      |                                                         |
| SDF_29     | CATTCCAGCAGCCATACTCAC                                                                                                                                                                                                                                                                                                                                                                                                                                                                                                                                                                                                                                                                                                                                                                                                                           | NCAM1 exon 3 SpCas9, Sanger-sequencing                  |
| SDF_30     | CGTAATAGCCCTCTGGGAAC                                                                                                                                                                                                                                                                                                                                                                                                                                                                                                                                                                                                                                                                                                                                                                                                                            |                                                         |
| CS_15      | TTTTCTACAGATCCTTAATTAAGCCG<br>CCACCATGAGCGAGGTGGAATTCAG<br>CCACGAGTACTGGATGCGGCACGCC<br>CTGACACTGGCCAAAAGAGCTTGGGA<br>CGAGAGGGAAGTGCCTGTGGGAGCT<br>GTGCTGGTGCACAACAACAGAGTGAT<br>CGGCGAAGGCTGGAACAGACCCATC<br>GGCAGACACGATCCTACAGCTCACG<br>CCGAGATCATGGCCCTGAGACAAGG<br>CGGACTGGTCATGCAGAACTACCGG<br>CTGATCGACGCCACACTGTACGTGAC<br>CCTGGAACCTTGCGTGATGTGTGCCG<br>GCGCTATGATCCACAGCAGAATCGGC<br>AGAGTGGTGTTTCGGCGCCAGAGATG<br>CCAAAACAGGCGCTGCCGGAAGCCT<br>GATGGATGTGCTGCATCACCCCGGC<br>ATGAACCACAGAGTGGAATCACCGA<br>GGGCATCCTGGCCGATGAATGTGCC<br>GCTCTGCTGAGCGACTTCTTCCGGAT<br>GCGGCGGCAAGAGATCAAGGCCAG<br>AAGAAGGCCAGTCCAGCACAGATA<br>GCGGCGGATCTAGCGGAGGCAGCTC<br>TGGATCTGAGACACCTGGCACAAGC<br>GAGAGCGCCACACCTGAAAGTTCTG<br>GCGGTTCTTCTGGCGGCAGCAGCGA<br>GGTCGAGTTCTCTCACGAATATTGGA<br>TGAGACACGCTCTCACCTGGCTAAG<br>AGAGCCAGGGACGAAAGAGAGGTGC | Gibson cloning of HE_ABE7.10co_4.1                      |

|        |                                                                                                                                                                                                                                                                                                                                                                                                                                                                                                                                                                                                                                                                                                                                                                                                                                                                                                                                                                                                                 |                                                 |
|--------|-----------------------------------------------------------------------------------------------------------------------------------------------------------------------------------------------------------------------------------------------------------------------------------------------------------------------------------------------------------------------------------------------------------------------------------------------------------------------------------------------------------------------------------------------------------------------------------------------------------------------------------------------------------------------------------------------------------------------------------------------------------------------------------------------------------------------------------------------------------------------------------------------------------------------------------------------------------------------------------------------------------------|-------------------------------------------------|
|        | <p>CAGTTGGCGCTGTCCTGGTGTGTTGAAC<br/> AATCGCGTCATCGGAGAAGGATGGAA<br/> TCGCGCCATTGGCCTGCACGATCCAA<br/> CCGCACATGCCGAAATTATGGCTCTG<br/> CGGCAAGGCGGCCTCGTGATGCAAA<br/> ATTACAGACTGATCGATGCTACCCTC<br/> TACGTCACCTTCGAGCCCTGTGTCAT<br/> GTGTGCTGGGGCAATGATTCACTCCC<br/> GGATTGGCCGCGTGGTGTGTTGGAGT<br/> GCGGAATGCCAAGACTGGCGCCGCT<br/> GGATCTCTGATGGACGTCCTGCACTA<br/> TCCTGGGATGAACCACCGGGTCGAG<br/> ATCACAGAGGGAATTCTGGCTGACGA<br/> GTGCGCTGCCCTGCTGTGCTACTTCT<br/> TTAGAATGCCCAGACAGGTGTTCAAC<br/> GCCAGAAAAAAGCTCAGAGCAGCA<br/> CCGATTCCGGCGGAAGCAGCGGAGG<br/> ATCTTCTGGAAGCGAAACCCAGGCA<br/> CCAGCGAGTCTGCCACACCAGAATCA<br/> TCTGGCGGTAGCTCTGGCGGATCTG<br/> ATAAAAAGTATTCTATTGGTTTAGCCA<br/> TCGGCACTAATTCCGTTGGATGGGCT<br/> GTCATAACCGATGAATACAAAGTACC<br/> TTCAAAGAAATTTAAGGTGTTGGGGA<br/> ACACAGACCGTCATTTCGATTA AAAAG<br/> AATCTTATCGGTGCCCTCCTATTTCGAT<br/> AGTGGCGAAACGGCAGAGGCGACTC<br/> GCCTGAAACGAACCGCTCGGAGAAG<br/> GTATACACGTCGCAAGAACCGAATAT<br/> GTTACTTACAAGAGATCTTCAGCAAC<br/> GAGATGGCCAA</p> |                                                 |
| CS_58  | CCCTACCAAAGACTTTGAGGgtttt                                                                                                                                                                                                                                                                                                                                                                                                                                                                                                                                                                                                                                                                                                                                                                                                                                                                                                                                                                                       | sgRNA cloning into<br>HE_ABE7.10co_4.1          |
| CS_59  | CCTCAAAGTCTTTGGTAGGGggtgt                                                                                                                                                                                                                                                                                                                                                                                                                                                                                                                                                                                                                                                                                                                                                                                                                                                                                                                                                                                       |                                                 |
| CS_184 | AGAAGTCCTCCAGGTGATGG                                                                                                                                                                                                                                                                                                                                                                                                                                                                                                                                                                                                                                                                                                                                                                                                                                                                                                                                                                                            | RT-PCR <i>NCAM1</i> exon 7 splice<br>donor site |
| CS_186 | ATCGCTGTGAGGGCAGAATC                                                                                                                                                                                                                                                                                                                                                                                                                                                                                                                                                                                                                                                                                                                                                                                                                                                                                                                                                                                            |                                                 |

**Table S4. Primary antibodies**

| <b>Antibody</b>        | <b>Manufacturer (catalogue number)</b> | <b>Working dilution</b> |
|------------------------|----------------------------------------|-------------------------|
| PAX7                   | Santa Cruz (sc-81648)                  | 1:200                   |
| KI-67                  | Thermo Fisher Scientific (MA5-14520)   | 1:300                   |
| MYF5                   | Santa Cruz (sc-302)                    | 1:2000                  |
| MYOD 5.8A              | Santa Cruz (sc 32758)                  | 1:50                    |
| Desmin                 | Dako (M0760)                           | 1:100                   |
| Desmin                 | Abcam (ab15200)                        | 1:2000                  |
| NCAM1 (CD56)           | Miltenyi Biotec (130-090-955)          | 1:200                   |
| Skeletal Myosin (fast) | Sigma-Aldrich (M4276)                  | 1:500                   |

## SUPPLEMENTAL FIGURES AND LEGENDS

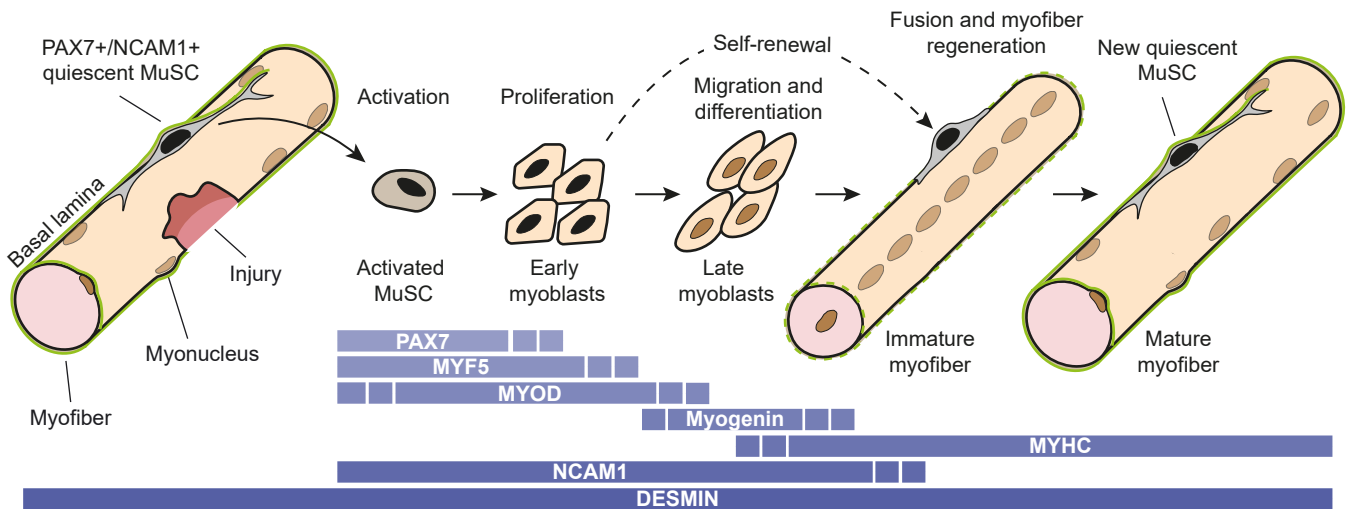

**Figure S1. The role of MuSC in muscle regeneration.** Adult skeletal muscle owns a population of quiescent MuSC responsible for muscle regeneration. Upon muscle damage or during homeostasis, MuSC activate and divide, giving rise to myogenic progenitor cells (early myoblasts). These cells can either re-enter quiescence to maintain the MuSC pool, or commit to differentiation, exit the cell cycle (late myoblasts) and fuse into post-mitotic multinucleated cells called myotubes or early myofibers. This process is regulated, amongst others, by the tightly timed expression of key myogenic regulatory transcription factors (i.e. PAX7, MYF5, MYOD, Myogenin) that control the downstream expression of muscle-related genes (i.e. the intermediate filament protein Desmin or the sarcomeric protein Myosin heavy chain, MYHC). Finally, myotubes mature into myofibers with peripherally located nuclei and a highly organized contractile apparatus, namely the functional units of skeletal muscle.

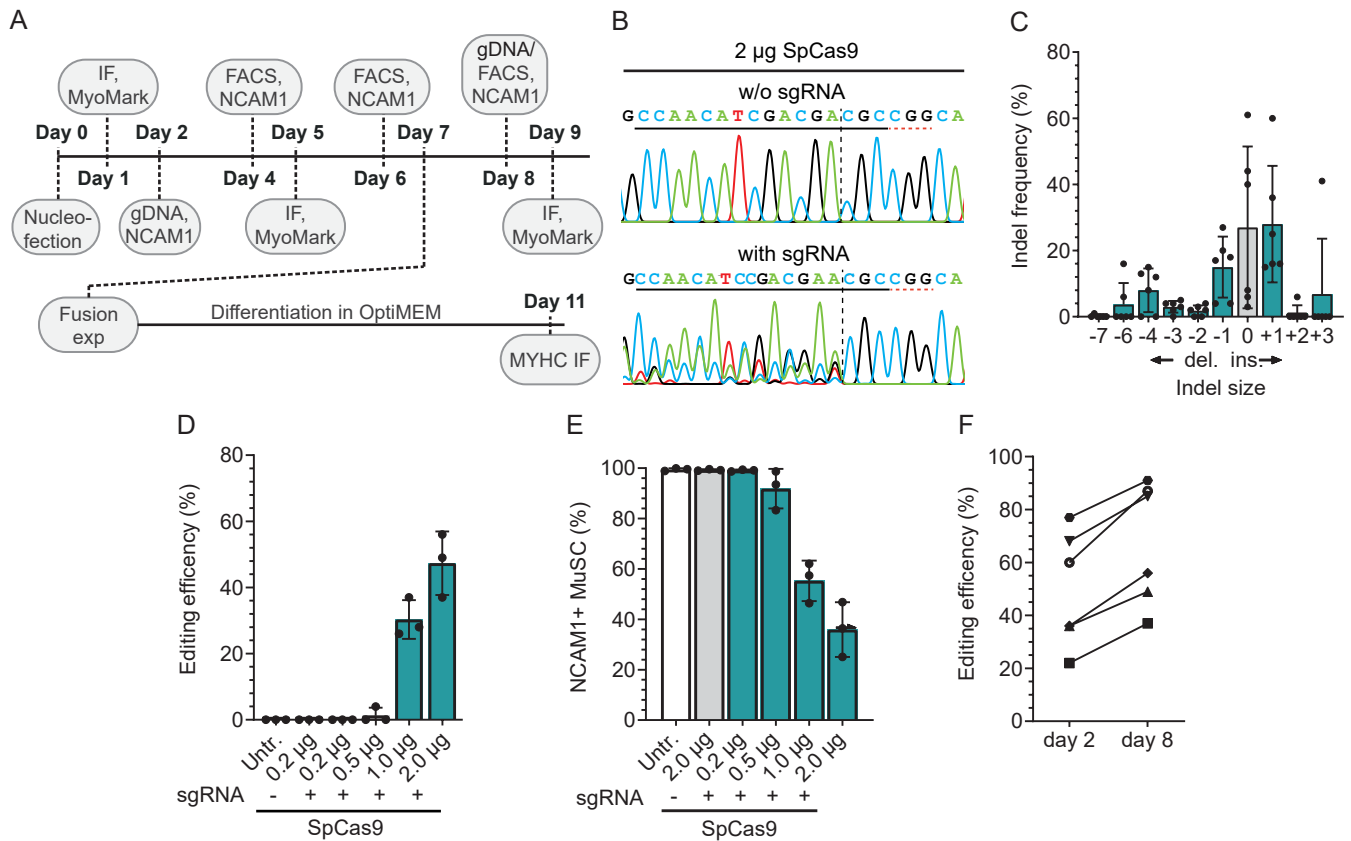

**Figure S2. SpCas9 mRNA transfection of primary MuSC induces a knock-out of the *NCAM1* gene.** **A)** Schematics of experimental plan. **B)** Representative Sanger-sequencing chromatograms of the region surrounding the sgRNA sequence obtained from MuSC from donor #1. The protospacer and PAM sequences are underlined. The discontinuous vertical line indicates the expected DSB site, 3 bp distal to the PAM. **C)** Indel plot from ICE analysis showing the predicted indel frequencies at day 8 post transfection ( $n = 6$ ; mean  $\pm$  SD). **D)** Editing efficiency with increasing amounts of SpCas9 mRNA (and sgRNA), day 8 post transfection ( $n = 3$ ; mean  $\pm$  SD). **E)** Percentage of NCAM1 positive cells with increasing amounts of SpCas9 mRNA (and sgRNA) ( $n = 3$ , mean  $\pm$  SD). **F)** Editing efficiency variations between day 2 and day 8 post transfection for each individual MuSC population ( $n = 6$ ).



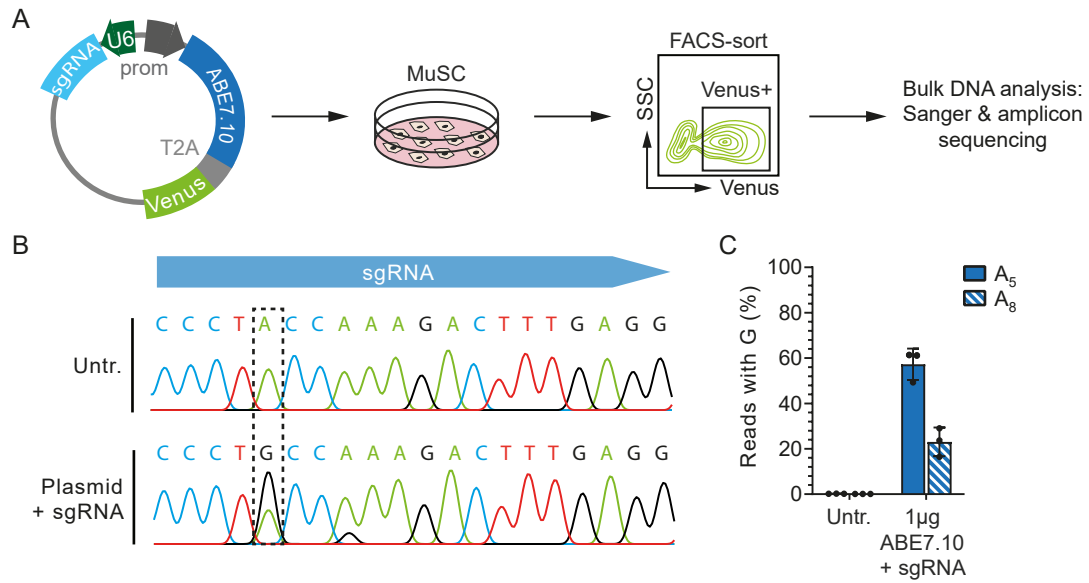

**Figure S3. Plasmid-based adenine base editing at the *NCAM1* locus targeting a splice donor site in human MuSC. A)** Schematic overview of experimental workflow. MuSC were transfected with a plasmid encoding ABE7.10 and a Venus fluorescence reporter, FACS-sorted and processed for DNA analysis via Sanger and amplicon sequencing. **B)** Sanger-sequencing chromatograms of edited samples (bottom) compared to the non-edited sequence (top). **C)** Percentage of NGS reads with A>G conversion at the target site ( $n = 3$ , mean  $\pm$  SD).

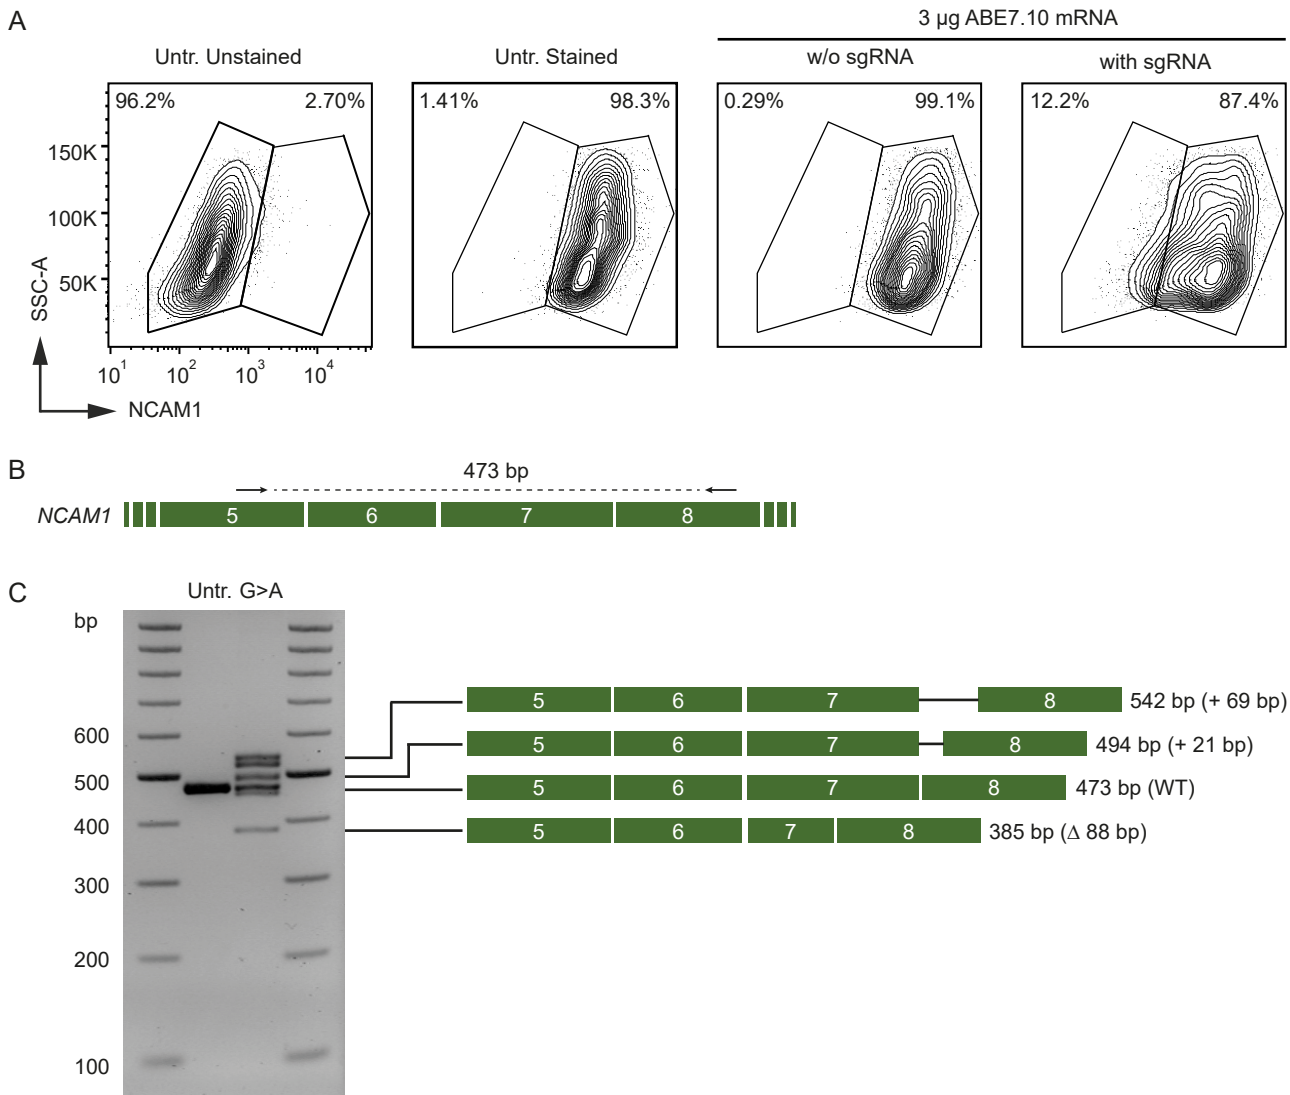

**Figure S4. Analysis of NCAM1 protein and mRNA in MuSC after editing the *NCAM1* exon 7 splice donor site.** **A)** Representative NCAM1 staining of ABE7.10-edited MuSC and controls. Flow cytometry performed at day 9 after transfection. **B)** Primer binding sites on the *NCAM1* coding sequence with the expected PCR-band size for unedited MuSC. Exons are represented as boxes. **C)** RT-PCR analysis of *NCAM1* mRNA for ABE7.10 mRNA-edited MuSC (G>A) and unedited MuSC. The splice isoforms whose identity was confirmed by Sanger sequencing are indicated on the right. Exons are represented as boxes. Interjacent intronic sequences are represented as lines. Untr.: Untransfected. WT: wild-type.

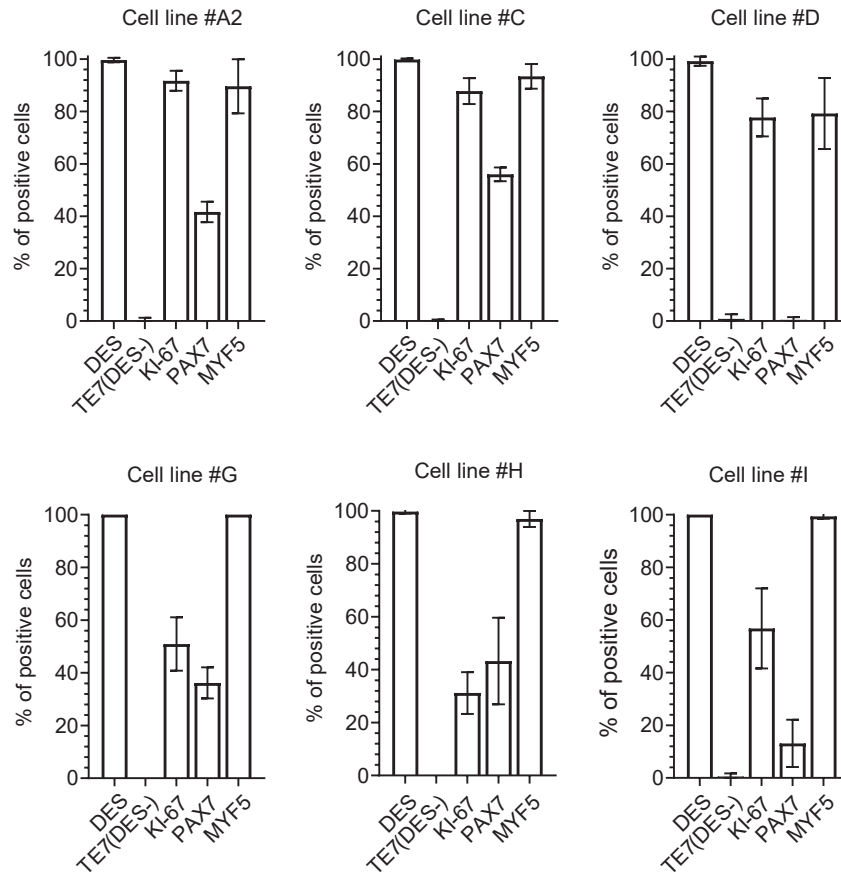

**Figure S5. Characterization of primary human MuSC used for SpCas9 mRNA-based editing.** Quantification of myogenic and proliferation markers in cells from all donors used for the SpCas9 mRNA-experiment before nucleofection ( $n = 6$ ; mean  $\pm$  SD of  $\geq 5$  images).

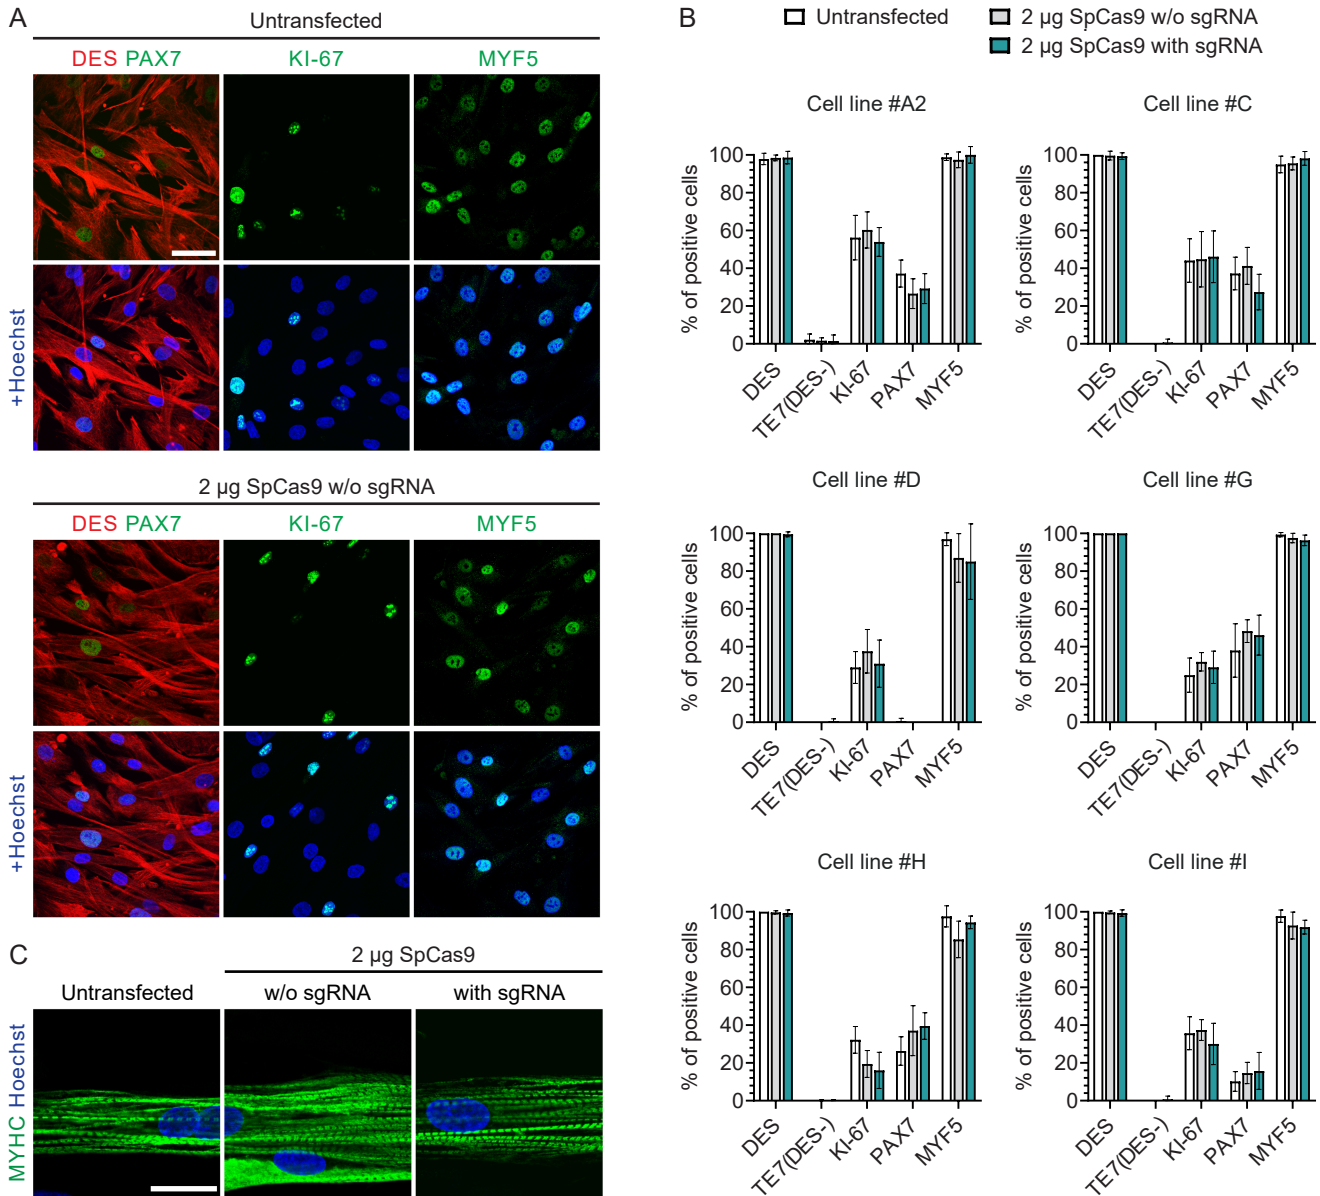

**Figure S6. SpCas9 mRNA transfection and *NCAM1* editing do not influence myogenic marker expression and differentiation of human MuSC.** **A)** Representative immunofluorescence staining for DES, PAX7, KI-67, and MYF5 of MuSC transfected with 2 μg SpCas9 mRNA w/o sgRNA, and untransfected control (day 5 post transfection). Scale bar: 50 μm. **B)** Quantification of myogenic and proliferation markers in SpCas9 mRNA-edited cells and controls (day 5 post transfection;  $n = 6$ ; mean  $\pm$  SD of  $\geq 5$  images;  $P$  value calculated with multiple unpaired t-tests; no significant changes). **C)** Zoom of representative confocal microscopy images of MuSC differentiated into myotubes after *NCAM1* knock-out using SpCas9 mRNA, and immunostained for MYHC. Scale bar: 50 μm. Nuclei were counterstained with Hoechst (blue).

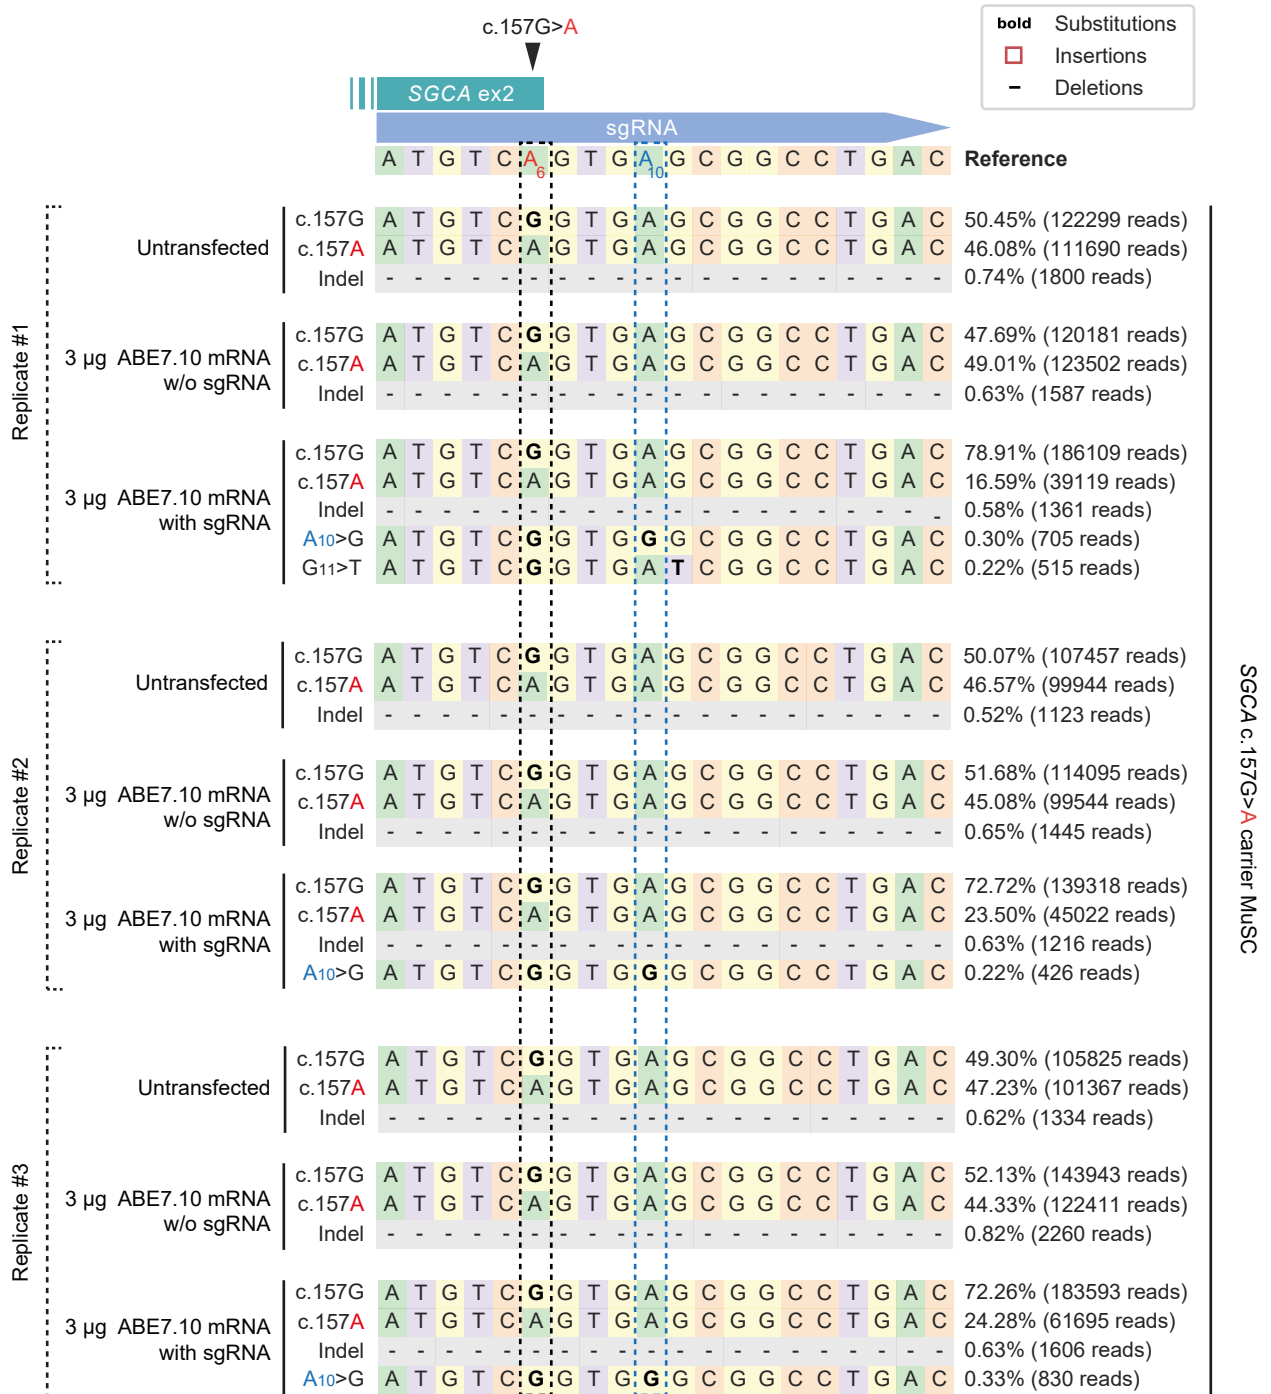

**Figure S7. Allele frequencies at the target site in SGCA c.157G>A carrier MuSC.** Analysis of amplicon sequencing data using CRISPResso2 shows allele frequencies within the sgRNA target site for untransfected and ABE7.10 mRNA +/- sgRNA transfected samples ( $n = 3$  repetitions). The SGCA c.157 target site is highlighted with a black dotted rectangle and an arrow. The bystander edit at protospacer position 10 is indicated with a blue dotted rectangle. The percentages of reads assigned to each allele type are shown on the right alongside the total number of aligned reads (in brackets).
